# Supplementary material for: Temporal Patterns of Bacterial and Viral Communities during Algae Blooms of a Reservoir in Macau
Source: MDPI journal article supplement (doi:10.3390/toxins13120894), 2021-12-13
Supplement: s1 [file s1]

Supplementary Information

# Temporal Patterns of Bacterial and Viral Communities during Algae Blooms of a Reservoir in Macau

Dini Hu <sup>1,2</sup>, John P. Giesy <sup>3,4,5</sup>, Min Guo <sup>6</sup>, Wai Kin Ung <sup>7</sup>, Yijun Kong <sup>7</sup>, Kai Meng Mok <sup>1</sup> and Simon Ming-Yuen Lee <sup>6,\*</sup>

<sup>1.</sup> Department of Civil and Environmental Engineering, Faculty of Science and Technology, University of Macau, Macau SAR, China; hudini@bjfu.edu.cn (D.H.); kmmok@um.edu.mo (K.M.M.)

<sup>2.</sup> Key Laboratory of Non-Invasive Research Technology for Endangered Species, School of Ecology and Nature Conservation, Beijing Forestry University, Beijing 100083, China

<sup>3.</sup> Department of Veterinary Biomedical Sciences and Toxicology Centre, College of Veterinary Medicine, University of Saskatchewan, Saskatoon, SK S7N5B3, Canada; jgiesy@aol.com

<sup>4.</sup> School of Biological Sciences, University of Hong Kong, Hong Kong SAR, China

<sup>5.</sup> State Key Laboratory of Pollution Control and Resource Reuse, School of the Environment, Nanjing University, Nanjing 210089, China

<sup>6.</sup> State Key Laboratory of Quality Research in Chinese Medicine and Institute of Chinese Medical Sciences, University of Macau, Macau SAR, China; guomin5208@163.com

<sup>7.</sup> Laboratory & Research Center, Macao Water Supply Co. Ltd., Conselheiro Borja, Macau, SAR, China; kin.ung@macaowater.com (W.K.U.); [edwards.kong@macaowater.com](mailto:edwards.kong@macaowater.com) (Y.K.)

\* Correspondence: [simonlee@um.edu.mo](mailto:simonlee@um.edu.mo)

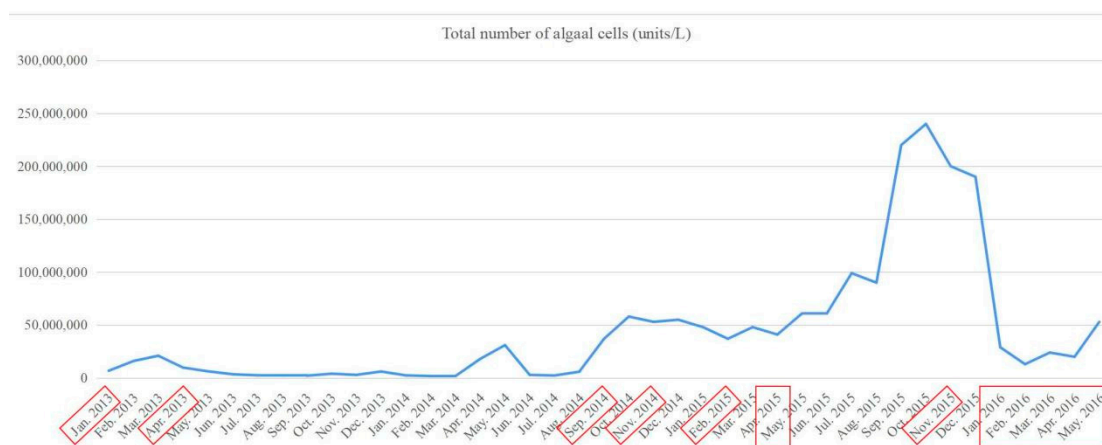

**Figure S1.** Total numbers of algal cells (units/L) in Macau Storage Reservoir (MSR) from 2013 to 2016.

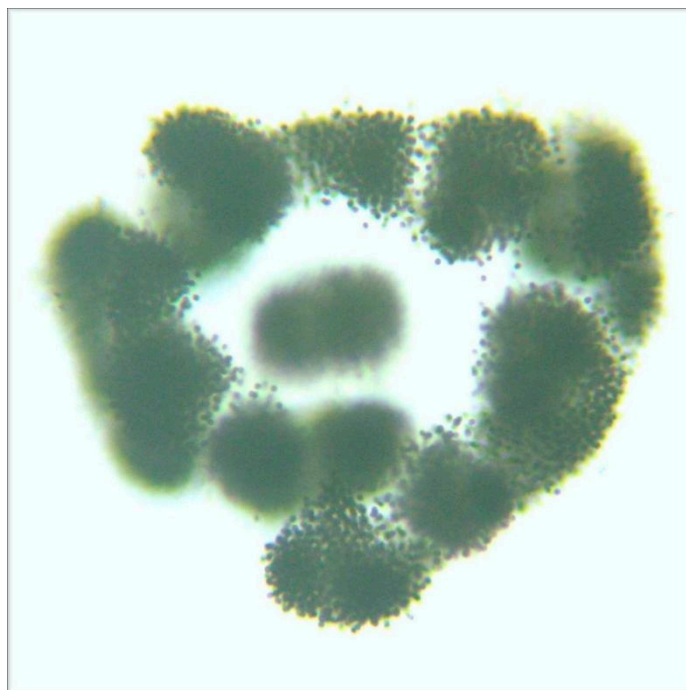

**Figure S2.** The microscopy photo of *Microcystis*.

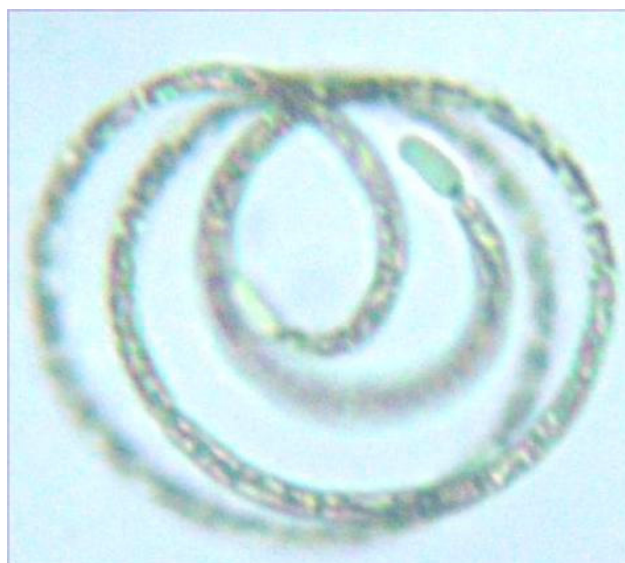

**Figure S3.** The microscopy photo of *Cylandrospermopsis*.

**Table S1.** The values of PD whole tree, Chao 1, observed species, shannon and simpson indices of selected samples.

|            | <b>PD Whole Tree</b> | <b>Chao1</b> | <b>Observed Species</b> | <b>Shannon</b> | <b>Simpson</b> |
|------------|----------------------|--------------|-------------------------|----------------|----------------|
| Jan. 2013  | 106.00               | 3699.91      | 1580.00                 | 7.68           | 0.97           |
| Apr. 2013  | 127.00               | 5228.34      | 1718.00                 | 7.86           | 0.97           |
| Sep. 2014  | 110.00               | 3585.52      | 1441.00                 | 7.36           | 0.96           |
| Nov. 2014  | 91.00                | 2704.88      | 1101.00                 | 6.74           | 0.95           |
| Feb. 2015  | 115.00               | 4218.09      | 1628.00                 | 7.75           | 0.97           |
| Apr. 2015  | 109.00               | 3880.41      | 1424.00                 | 7.45           | 0.97           |
| May. 2015  | 111.00               | 4119.54      | 1419.00                 | 7.53           | 0.98           |
| Nov. 2015  | 119.00               | 4301.21      | 1490.00                 | 8.02           | 0.98           |
| Jan. 2016  | 113.00               | 3979.99      | 1486.00                 | 7.81           | 0.98           |
| Feb. 2016  | 82.00                | 3205.30      | 1373.00                 | 7.56           | 0.97           |
| Mar. 2016  | 116.00               | 4423.81      | 1728.00                 | 8.04           | 0.97           |
| Apr. 2016  | 101.00               | 3548.72      | 1312.00                 | 7.24           | 0.97           |
| May. 2016  | 71.00                | 2062.09      | 955.00                  | 5.82           | 0.89           |
| Mean value | 105.46               | 3765.99      | 1435.00                 | 7.45           | 0.96           |
